# Supplementary material for: Structural and Dynamic Requirements for Optimal Activity of the Essential Bacterial Enzyme Dihydrodipicolinate Synthase
Source: PLOS journal article supplement (doi:10.1371/journal.pcbi.1002537), 2012-06-07
Supplement: S3 (10.1371/journal.pcbi.1002537.s003) [file journal.pcbi.1002537.s003]

301 Moved Permanently

# Moved Permanently

The document has moved here.

---

Apache Server at www.ploscompbiol.org Port 80
